# Supplementary material for: Asymmetric photocycloaddition of naphthamide with a diene using the provisional molecular chirality in a chiral crystal
Source: Royal Society of Chemistry journal article supplement (doi:10.1039/c1pp05053b), 2011-06-03

## Supporting Information

To accompany

### **Asymmetric Photocycloaddition of Naphthamide with Diene Using the Provisional Molecular Chirality in a Chiral Crystal**

Masami Sakamoto,\* Fumitoshi Yagishita, Ayako Saito, Shuichiro Kobaru, Atsushi Unosawa,  
Takashi Mino, and Tsutomu Fujita

*Department of Applied Chemistry and Biotechnology, Graduate School of Engineering,*

*Chiba University, Yayoi-cho, Inage-ku, Chiba, 263-8522, Japan*

## Table of Contents

|                                                                                                                      |    |
|----------------------------------------------------------------------------------------------------------------------|----|
| General experimental: -----                                                                                          | S3 |
| Preparation of <i>N</i> -(2-methoxy-1-naphthoyl)piperidine 1 and <i>N</i> -(2-ethoxy-1-naphthoyl)pyrrolidine 4 ----- | S3 |
| Typical procedure for the photoreaction of 1 with diene 2-----                                                       | S3 |
| Spectral Data of <i>endo</i> -3 -----                                                                                | S3 |
| Spectral Data of <i>endo</i> -5 -----                                                                                | S4 |
| Figure S1. X-Ray crystallographic analysis of <i>endo</i> -5 -----                                                   | S4 |
| Figure S2. <sup>1</sup> H NMR spectrum of <i>endo</i> -3 -----                                                       | S5 |
| Figure S3. <sup>13</sup> C NMR spectrum of <i>endo</i> -3 -----                                                      | S6 |
| Figure S4. <sup>1</sup> H NMR spectrum of <i>endo</i> -5 -----                                                       | S7 |
| Figure S5. <sup>13</sup> C NMR spectrum of <i>endo</i> -5 -----                                                      | S8 |

## General experimental

**General.** NMR spectra were recorded on CDCl<sub>3</sub> solutions on a BRUKER 300 operating 300 MHz for <sup>1</sup>H- and <sup>13</sup>C-NMR spectroscopy, respectively. Chemical shifts were reported in parts per million (ppm) relative to TMS as internal standards. IR spectra were recorded on a JASCO FT/IR-230 spectrometer as KBr disks. Eikosya 500 W high pressure mercury lamp and SAN-EI ELECTRIC 350 W super high pressure mercury lamp were used as the irradiation sources.

## Preparation of *N*-(2-methoxy-1-naphthoyl)piperidine **1** and *N*-(2-ethoxy-1-naphthoyl)pyrrolidine **4**

*N*-(2-methoxy-1-naphthoyl)piperidine **1** and *N*-(2-ethoxy-1-naphthoyl)pyrrolidine **4** used for photoreaction were prepared according to the literature.<sup>4</sup> 2,5-Dimethylhexa-2,4-diene **2** were commercially available, and were purified by distillation before use. The crystals of **1** used for the asymmetric synthesis were prepared by stirred crystallization at high temperature, by which the completely melted sample of **1** at 120°C (mp: 110-112°C) was cooled and solidified by lowering the temperature to 100°C with stirring. A high level of reproducibility of both chiral crystallization and asymmetric photoreaction was achieved by this method. Of course, the desired crystals of **1** could be selectively prepared in large quantities by the addition of a corresponding seed crystal during the crystallization process.

## Typical procedure for the photoreaction of **1** with diene **2**

Crystals of **1** were added to a cooled and deoxygenated (by bubbling argon) toluene solution containing diene **2** (0.1 mol/L), and the solution was irradiated with a Pyrex filtered light using a 350-W super-high pressure mercury lamp for 0.25 - 1.0 h at the same temperature. After removing the solvent in vacuo, the crude photolysate was subjected to chromatography on silica gel. The 2+2 cycloadduct **3** was isolated. The chemical yield of **3** was determined on the basis of the consumed naphthamide **1**.

## Spectral data of *endo*-**3**

Viscous oil: IR (cm<sup>-1</sup>, neat) 1641; <sup>1</sup>H-NMR: (CDCl<sub>3</sub>) δ 0.44 (s, 3H), 1.25-1.40 (m, 6H), 1.57 (s, 3H), 1.73 (s, 3H), 1.77 (s, 3H), 2.70-2.85 (m, 2H), 3.22 (s, 3H), 3.53 (d, *J* = 10.6 Hz, 1H), 3.83-3.86 (m, 1H), 5.24 (d, *J* = 10.6 Hz, 1H), 6.15 (d, *J* = 10.2 Hz, 1H), 6.61 (d, *J* = 10.2 Hz, 1H), 6.90-6.93 (m, 1H), 7.07-7.10 (m, 1H), 7.13-7.17 (m, 2H); <sup>13</sup>C-NMR: (CDCl<sub>3</sub>) δ 18.3, 23.8, 24.4, 24.6, 25.5, 26.2, 28.2, 30.0, 43.4, 44.2, 47.6, 49.7, 54.4, 58.2, 76.8, 119.1,

124.8, 126.4, 126.5, 127.4, 128.0, 129.0, 131.1, 134.4, 135.8, 171.9; HRMS (ESI-MS)  $m/z$  calcd for  $C_{25}H_{33}NO_2Na$  402.2404, found 402.2389.

### Spectral data of *endo-5*

Mp: 158-159°C; IR ( $cm^{-1}$ , neat) 1628;  $^1H$ -NMR: ( $CDCl_3$ )  $\delta$  0.46 (s, 3H), 1.06 (t,  $J = 7.0$  Hz, 3H), 1.40-1.60 (m, 2H), 1.58 (s, 3H), 1.70-1.80 (m, 2H), 1.70 (s, 3H), 1.74 (s, 3H), 3.17-3.22 (m, 2H), 3.43 (q,  $J = 7.0$  Hz, 2H), 3.40-3.46 (m, 2H), 3.65 (d,  $J = 10.6$  Hz, 1H), 5.27 (d,  $J = 10.6$  Hz, 1H), 6.19 (d,  $J = 10.1$  Hz, 1H), 6.59 (d,  $J = 10.1$  Hz, 1H), 6.90-6.93 (m, 1H), 7.06-7.10 (m, 1H), 7.13-7.18 (m, 2H);  $^{13}C$ -NMR: ( $CDCl_3$ )  $\delta$  16.1, 18.4, 23.5, 23.8, 25.0, 26.2, 26.5, 26.8, 43.4, 46.9, 47.0, 53.9, 57.0, 59.2, 60.8, 75.7, 118.9, 126.4, 126.4, 126.7, 127.3, 128.2, 128.9, 131.8, 134.6, 135.2, 172.8; HRMS (ESI-MS)  $m/z$  calcd for  $C_{25}H_{33}NO_2Na$  402.2404, found 402.2390.

### X-Ray crystallographic analyses of *endo-5*

Crystal data of *endo-5*: (recrystallized from a mixture of  $CHCl_3$  and hexane);  $C_{25}H_{33}NO_2$ ,  $Mr = 379.52$ , Orthorhombic space group  $P2_1/c$ ,  $a = 7.525(9)$  Å,  $b = 24.63(3)$  Å,  $c = 11.729(15)$  Å,  $\beta = 98.548(18)^\circ$ ,  $V = 2150(5)$  Å<sup>3</sup>,  $Z = 4$ ,  $\rho = 1.173$  Mg/m<sup>3</sup>, in the final least-squares refinement cycles on  $F^2$ , the model converged at  $R_1 = 0.0515$ ,  $wR_2 = 0.1057$ , and GOF = 0.905 for 3963 reflections CCDC 810675.

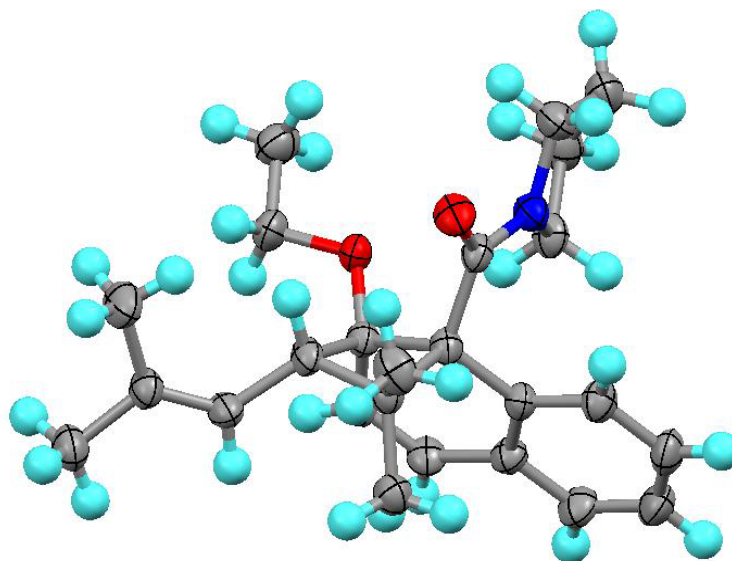

**Fig. S1.** Ortep view of *endo-5* showing the atoms and thermal ellipsoids at 40% probability.

Figure S2. <sup>1</sup>H NMR spectrum of *endo-3*

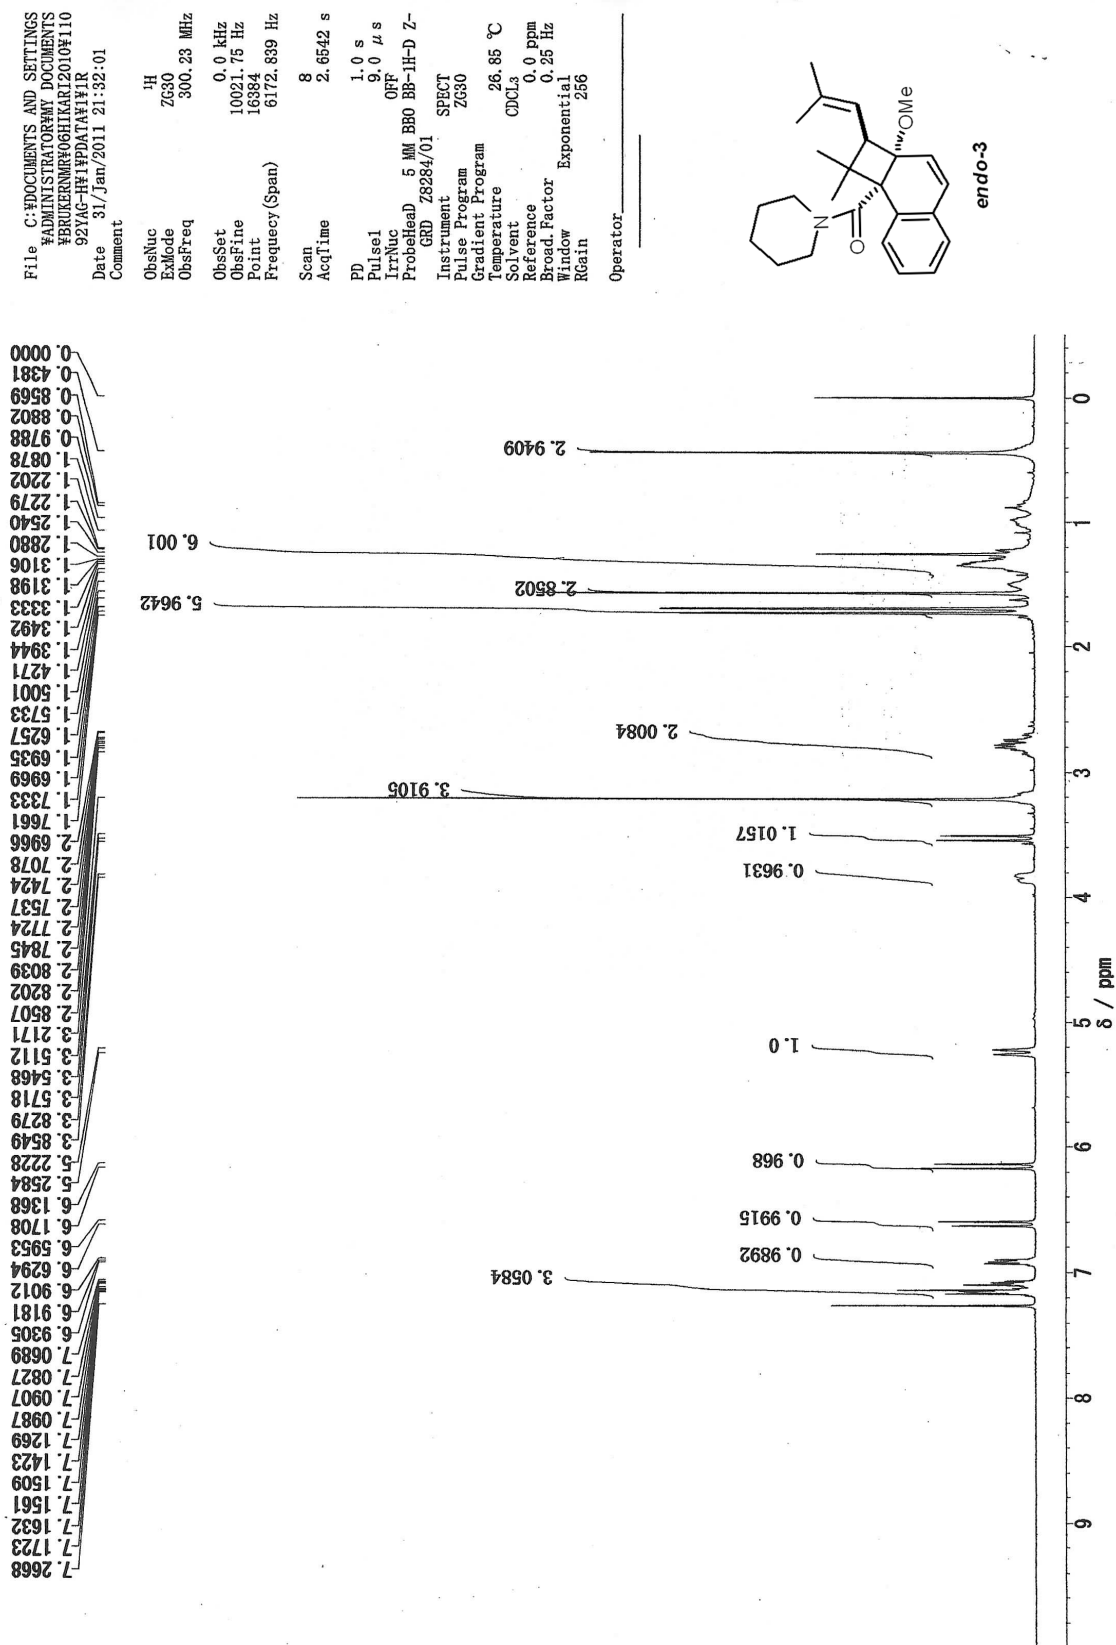



Figure S3.  $^{13}\text{C}$  NMR spectrum of *endo-3*

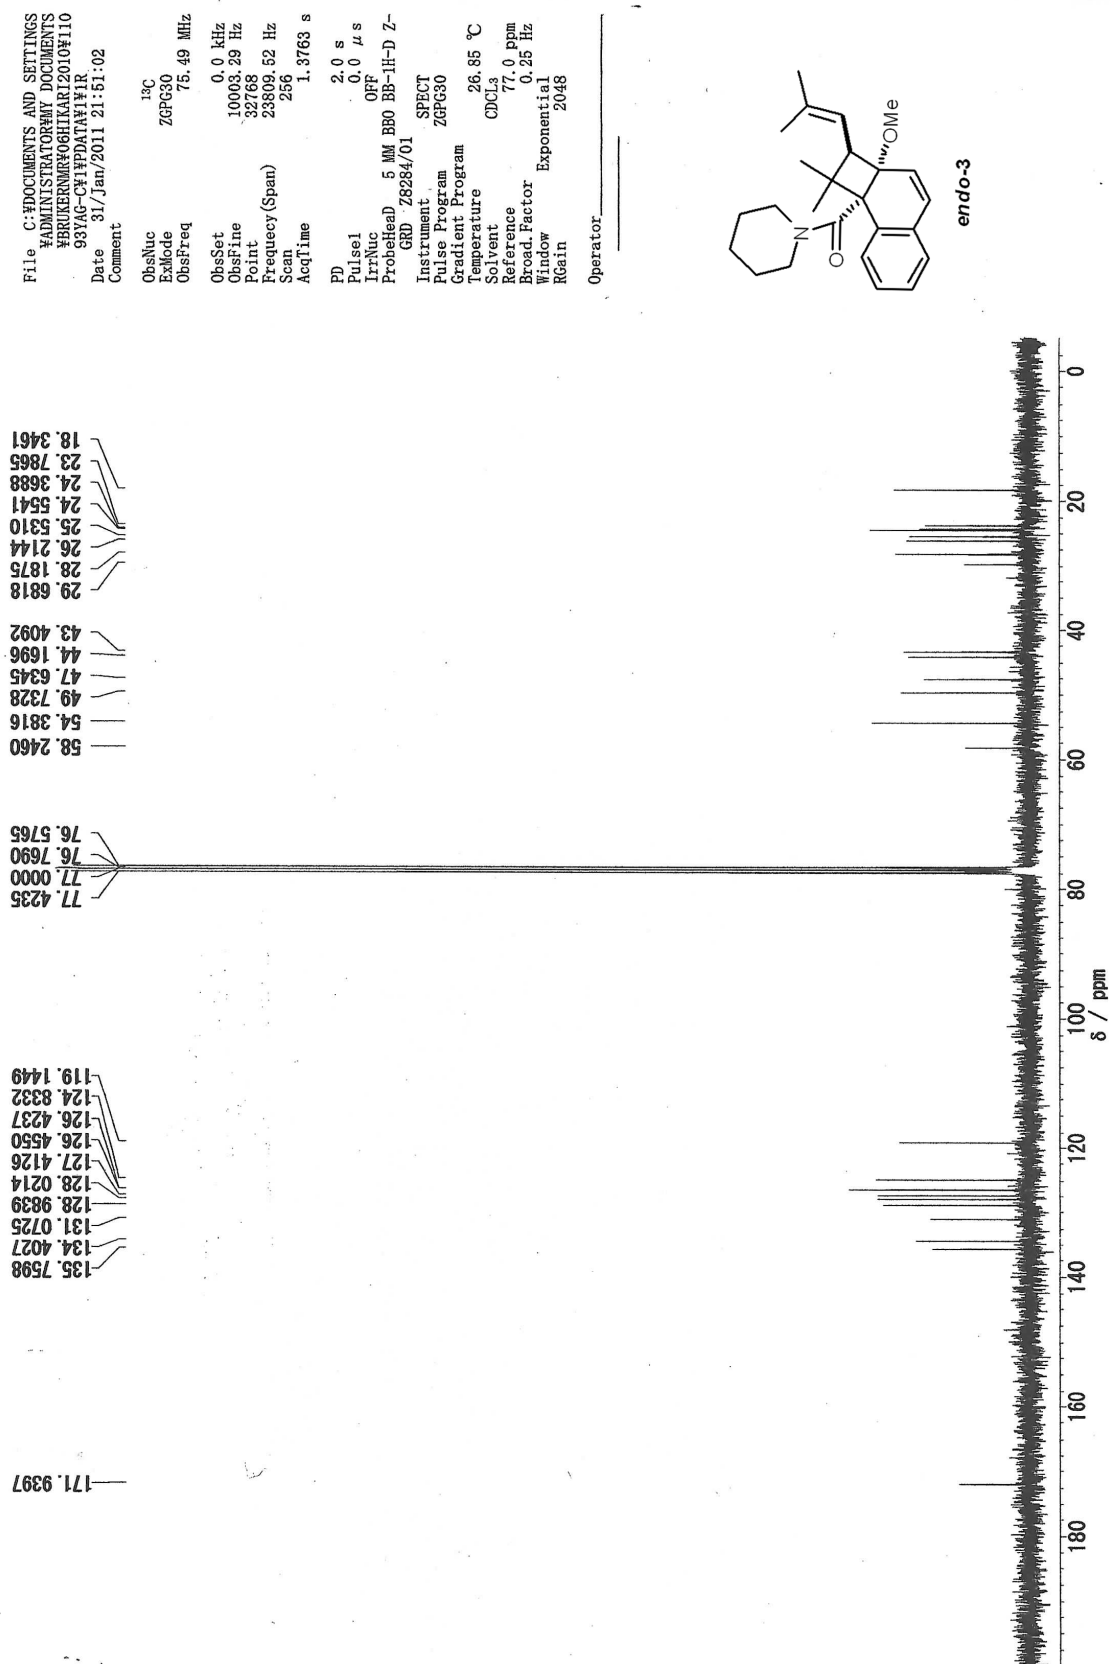

Figure S4. <sup>1</sup>H NMR spectrum of *endo-5*

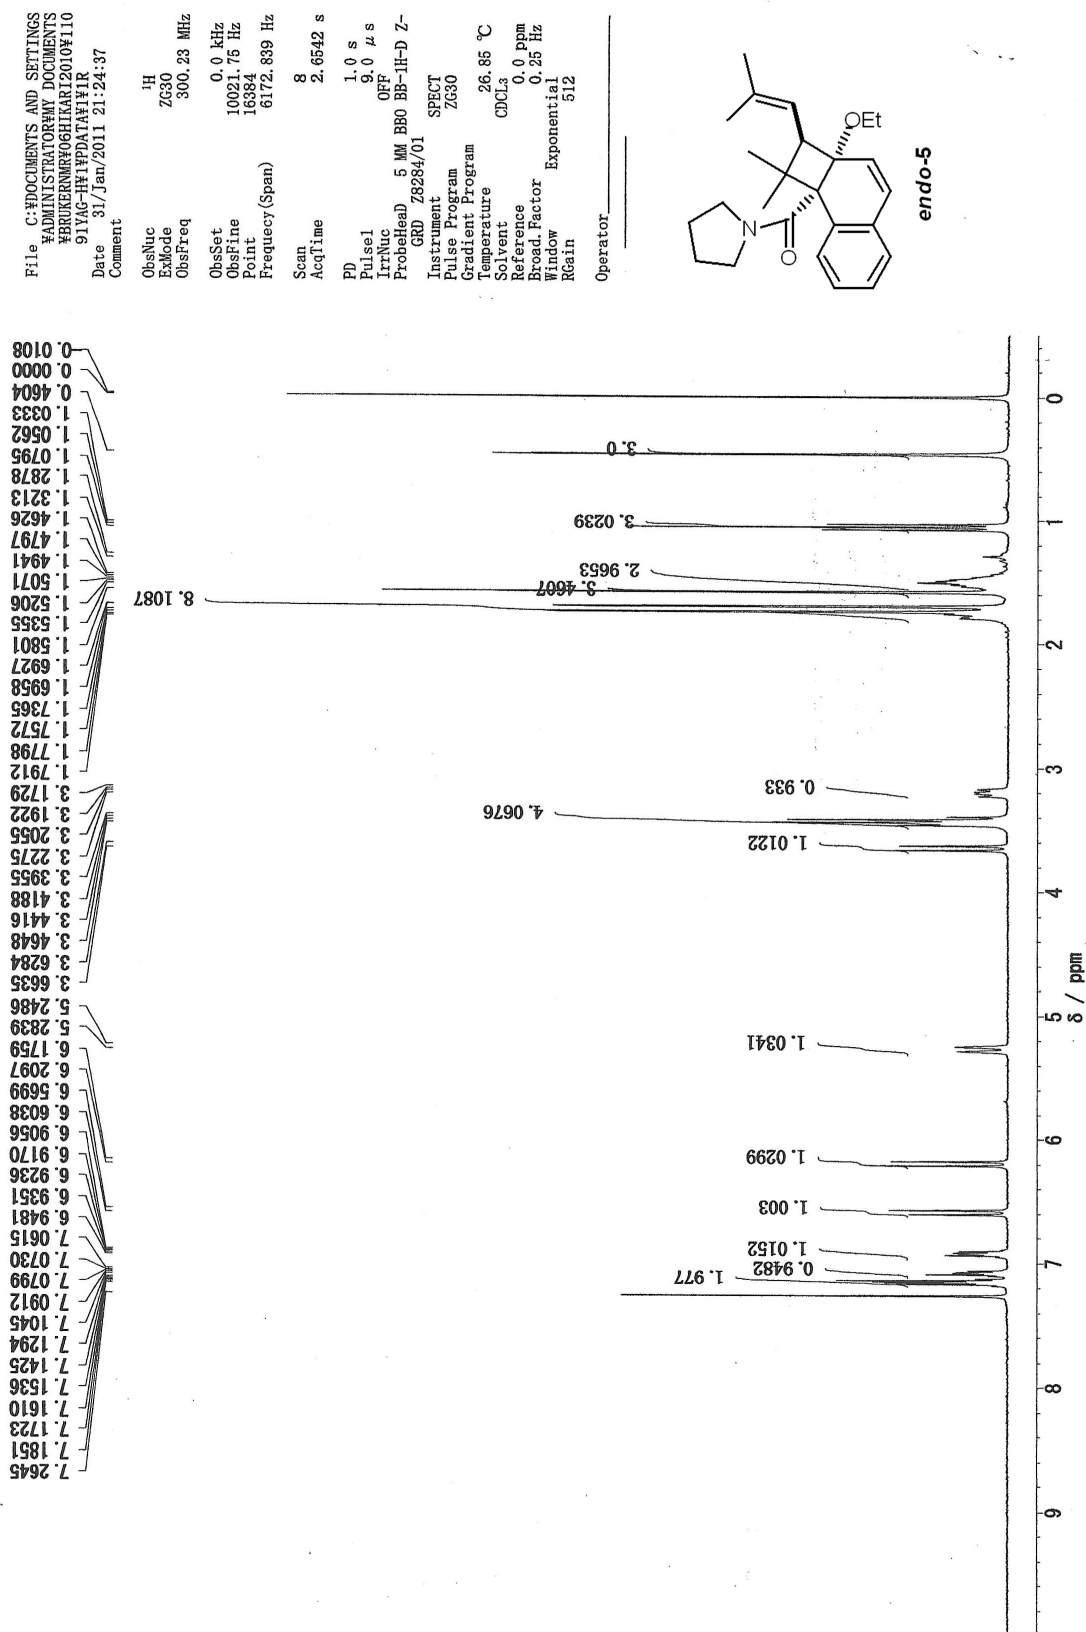





Figure S5.  $^{13}\text{C}$  NMR spectrum of *endo-5*

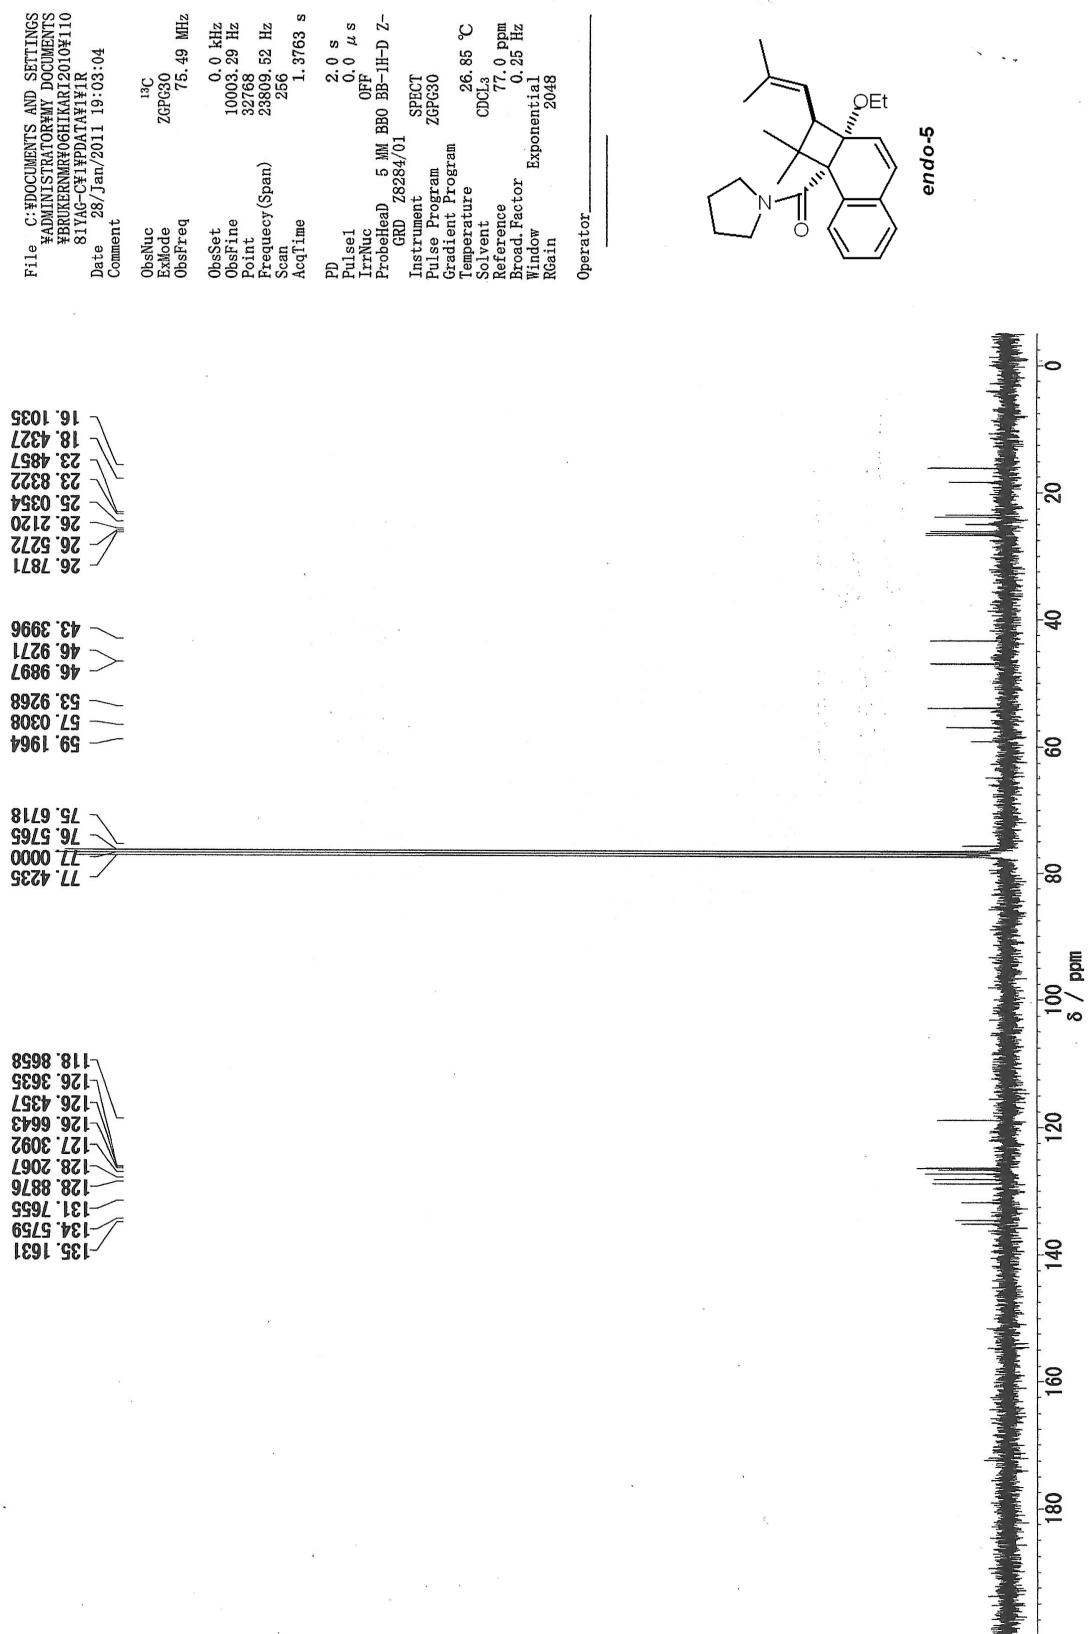

Supplement: c1pp05053b.pdf [file c1pp05053b.pdf]
